# Supplementary material for: Self-assembled monolayers of benzylmercaptan and para-cyanobenzylmercaptan on gold: surface infrared spectroscopic characterization
Source: Royal Society of Chemistry journal article supplement (doi:10.1039/b923628g), 2010-01-01
Supplement: b923628g.pdf [file b923628g.pdf]

### Supplementary Information

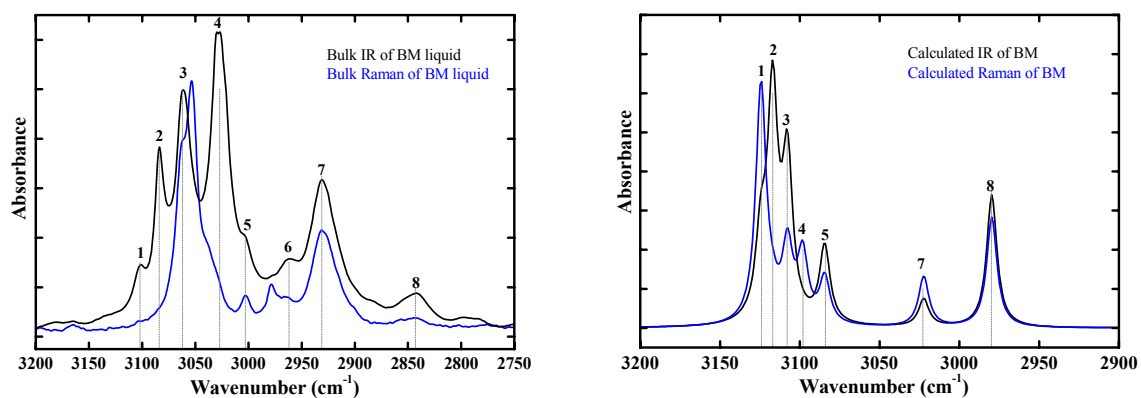

**Figure S1:** Carbon-Hydrogen stretching frequency region of bulk IR and Raman of BM liquid (left) and calculated IR and Raman of BM (right).

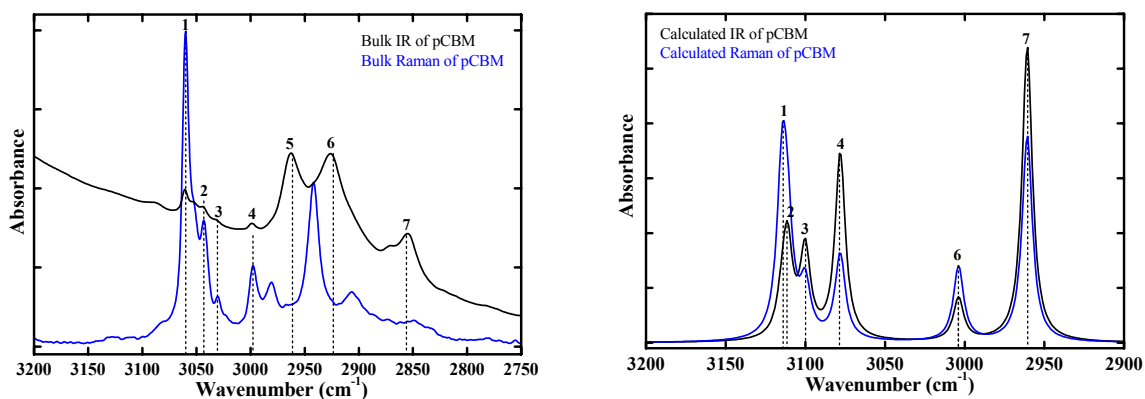

**Figure S2:** Carbon-Hydrogen stretching frequency region of bulk IR and Raman of pCBM liquid (left) and calculated IR and Raman of pCBM (right).

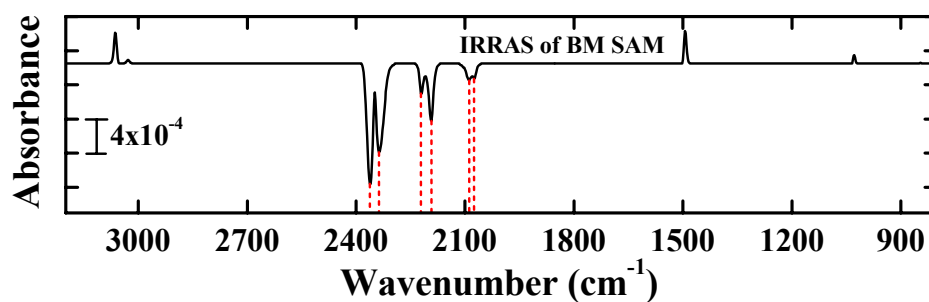

**Figure S3:** Negative absorption bands in the region from 2400 cm<sup>-1</sup> to 2000 cm<sup>-1</sup>.
